# Supplementary material for: Plasma Metabolomic Changes following PI3K Inhibition as Pharmacodynamic Biomarkers: Preclinical Discovery to Phase I Trial Evaluation
Source: Oxford University Press journal article supplement (doi:10.1158/1535-7163.mct-15-0815), 2016-04-06
Supplement: 15357163mct150815-sup-156361_1_supp_3370296_q2yrft.xlsx [file 15357163mct150815-sup-156361_1_supp_3370296_q2yrft.xlsx]

## Sheet: Sheet1
Patient No	Dose of pictilisib (mg/day)	Timepoint (h)	C0	C10	C10:1	C10:2	C12	C12-DC	C12:1	C14	C14:1	C14:1-OH	C14:2	C14:2-OH	C16	C16-OH	C16:1	C16:1-OH	C16:2	C16:2-OH	C18	C18:1	C18:1-OH	C18:2	C2	C3	C3-DC (C4-OH)	C3-OH	C3:1	C4	C4:1	C5	C5-DC (C6-OH)	C5-M-DC	C5-OH (C3-DC-M)	C5:1	C5:1-DC	C6 (C4:1-DC)	C6:1	C7-DC	C8	C9	Ala	Arg	Asn	Asp	Cit	Gln	Glu
10	45	2	5.29942	-14.4832	-11.7583	0.689625	-16.6973	-12.9402	15.2293	16.8908	4.90899	-13.035	-7.38541	28.0109	-13.1498	34.1196	5.75683	52.7284	-34.8678	29.7876	46.5267	16.7473	-17.8686	28.6355	6.47203	13.3053	-16.5645	-40.5103	-0.106423	-4.08656	2.13503	15.8703	-13.1303	-7.63508	3.30854	-1.54763	-20.9117	41.3615	2.69136	-20.1207	-14.0789	-15.8439	10.9258	21.6585	8.44317	-2.40184	28.0155	15.0615	-11.0493
10	45	8	-6.65442	-53.0026	-4.53063	-21.8487	-14.6238	13.9587	-6.50047	-24.5032	1.41025	-35.0944	-15.9604	-17.7505	-11.0581	-20.203	-4.2063	4.97805	-20.2964	-31.701	-2.19799	-10.896	43.912	41.6415	-1.72196	-17.3473	-1.34447	-56.8826	9.11	-15.7972	-6.13386	-13.8313	6.95269	-35.1354	53.1359	-6.83779	-20.9822	-45.0376	-29.7731	-51.7273	-32.251	-25.1971	-13.0862	2.79509	0.199361	-35.6808	2.4634	7.41161	-42.1294
10	45	24	-3.78818	-15.5673	-19.3502	-42.2418	-4.71014	-7.37743	4.97166	-15.4844	39.6619	62.4374	14.7334	-19.4592	71.835	-37.3743	49.4574	5.96066	-24.8979	22.8672	17.6722	47.5824	91.0315	52.6471	34.5799	-21.194	-10.2688	-43.2985	5.87351	-10.4231	-37.5529	-5.39778	-32.9076	-7.55919	0.0919251	1.40003	11.1695	44.4358	-27.4157	-21.5677	-21.114	-27.6038	-18.9081	16.0347	-7.33339	-7.4576	47.3941	18.1005	10.2667
11	45	2	-1.09277	-8.37411	9.45715	53.3855	-12.2181	1.60986	32.5257	6.98733	1.64007	1.76916	-10.0479	-21.3894	-15.8901	22.4488	-3.45592	-26.5811	66.2242	47.7075	36.0187	-8.91747	55.9862	-16.9091	29.6356	-23.9513	20.8384	2.7773	6.77186	-6.83754	-2.14471	3.46477	53.7271	14.4057	5.29583	36.845	36.7713	5.64087	-1.93035	32.4423	-8.42269	35.4018	2.46541	29.2681	11.2545	-15.2447	7.51186	11.8915	-9.69995
11	45	8	10.4779	-36.1152	5.83807	0.446151	46.3192	22.3676	0.898921	-12.7086	-16.7106	13.0994	-45.1526	-3.29098	-13.3424	22.47	-30.5644	4.13529	-35.6475	75.8716	5.73878	-34.6037	-0.950837	-42.305	-36.2343	65.5903	-17.954	82.2499	5.41048	-5.82715	-24.7796	55.7107	-1.32124	3.01895	2.38122	25.6597	-10.1645	45.1468	-7.71229	-29.7572	-44.1527	200.622	27.2043	58.5126	22.6602	-0.0430989	44.9533	8.71977	6.60182
11	45	24	13.3873	-30.8329	-5.11498	32.8126	23.5577	-5.38342	-10.8511	-19.7604	-15.7364	-12.1408	-48.2659	-39.49	-41.008	-17.2762	-54.7333	-34.3203	0.0411238	4.40373	25.5076	-54.2358	15.6709	-42.4754	-31.085	14.8224	-21.8691	-8.55613	-100	-0.670837	-12.3123	19.7731	-30.0452	11.1271	-30.1882	17.6249	-33.2551	-16.1162	-28.941	-29.1223	-33.4549	49.7189	19.9108	16.9395	0.180436	-1.65887	6.10437	-16.5097	14.7257
12	60	2	-7.07838	19.4421	15.9946	6.77653	7.55368	26.4926	14.7567	-1.01727	1.77539	86.8664	-16.1527	-42.6166	-14.3047	-24.2666	-1.97197	30.019	-25.7833	-16.1498	28.8112	9.9496	59.3006	-24.7427	11.6031	-6.10258	79.1569	#DIV/0!	15.8404	-23.1381	-6.03178	13.9137	3.34634	-44.3229	7.12461	-18.2933	6.69421	25.7305	41.7372	17.2758	7.63803	-2.2886	8.70308	35.6641	19.3753	0.327089	17.4709	18.0392	18.4264
12	60	8	-1.09025	-20.8813	21.966	-13.5037	33.9603	83.6073	45.7648	-23.5617	-5.97793	25.6629	-29.8036	-58.4638	-35.3151	-3.47189	14.3366	-7.2728	-28.2263	-47.9594	17.9888	-14.468	31.946	-11.1522	27.7245	-30.2146	27.1941	#DIV/0!	-0.355593	-31.8404	-16.5288	-30.1292	-39.4846	-34.8958	-13.7945	5.97947	-27.159	33.7012	1.54993	-27.38	-18.4084	-12.0333	-2.45889	39.0308	17.1216	-3.01456	29.6346	35.4606	10.7006
12	60	24	-15.2286	10.2512	2.90333	-9.06666	10.2681	66.1076	32.7509	-0.971852	21.4092	14.3526	9.00092	-5.62553	-18.0976	-19.8385	31.4315	18.9468	-3.37289	-18.8705	-41.0101	-0.0898646	-29.8718	-26.7066	0.713144	-38.0436	10.5999	#DIV/0!	-8.53848	-39.9914	-100	-30.4341	-27.9192	-52.2878	-10.6818	-12.1943	23.5828	-5.24808	-17.8598	-39.9566	-8.3453	-22.4704	-0.920804	29.3806	1.11251	-7.06142	13.334	17.6461	-23.9229
13	60	2	-22.3698	-31.5542	-10.4259	-40.1754	-6.62157	-8.56244	-14.2074	-6.20803	-13.4546	1.74916	-29.7267	-28.6712	19.9899	-20.5758	-22.4337	-44.0859	-10.4487	-67.5587	21.4685	-3.64107	-26.7819	17.3382	-21.5096	-6.1938	18.3648	-67.1174	67.7465	-3.16471	-4.07373	4.69409	-27.0418	-34.2503	-41.8696	-9.96499	-73.1374	-14.23	-57.1735	-43.0135	-22.2894	-23.9436	-2.2025	10.9025	7.74581	-36.5053	-13.6247	-2.87252	-14.2418
13	60	8	7.12424	-31.8349	-16.8002	-12.3212	-16.6538	-28.9691	-16.4698	-11.6756	14.041	41.8861	-26.5285	-14.4891	-2.97383	2.76863	-36.936	-28.4739	37.1252	-36.6003	18.8012	-10.5465	-28.7079	15.0309	-4.80006	26.075	8.59633	-69.488	9.4928	21.9681	-4.49188	32.3665	-9.16243	-12.71	-25.1606	-20.907	-37.0206	-27.3217	-9.27817	-46.4279	-7.71029	-52.3766	-11.9344	21.7385	6.65871	-17.693	-10.4107	7.30035	36.8872
13	60	24	-6.75551	-9.55618	-31.3213	-29.6269	-9.09171	-7.79803	-28.9357	-33.6519	-14.7055	-1.42322	-28.927	-4.37834	-7.30031	14.0086	-34.9098	-44.6331	-32.189	-55.7576	-6.56497	-17.7157	-59.0401	34.225	-34.8714	34.8792	-35.4238	-66.5444	-10.6715	33.3515	-53.7662	24.4733	-8.87804	-42.8494	-36.5866	-29.7678	-63.8657	-11.7055	-37.541	13.4552	-5.28285	-1.96043	33.4199	15.5327	12.7442	-16.622	-16.0994	-0.0398375	-44.9143
14	60	2	15.924	33.1746	5.71694	14.2073	74.5128	-15.6551	-3.50788	0.330045	19.9906	24.5158	19.6773	17.0514	3.28425	22.1499	-15.1313	85.5403	12.8631	26.8008	78.6611	-24.1507	50.6733	19.7294	31.1608	16.7792	24.673	26.5967	15.7242	14.8688	-5.45521	78.6168	18.0714	-1.44642	34.0176	34.3897	196.802	4.147	19.6941	33.0925	27.7338	-12.1465	68.6057	41.9019	24.7894	-17.2156	0.477405	22.5604	-7.71628
14	60	8	0.276304	2.30866	12.3907	32.7713	98.6702	28.0386	26.9224	8.29022	28.3316	14.745	73.4915	47.6206	-6.69762	67.2136	-30.3083	85.8276	82.9825	126.753	97.2468	-53.0336	138.96	83.3787	-13.9835	1.43883	-9.10514	14.8685	44.3504	-12.7276	49.5619	99.6125	43.7608	41.1118	62.5594	113.211	172.105	-22.1454	83.1326	45.688	-14.5623	21.6788	17.2034	-15.6306	-24.3196	-31.5823	5.70906	28.0595	-19.8901
14	60	24	-1.74179	-36.6482	-12.0247	29.5555	94.4234	-1.29328	-23.0075	1.90493	0.575111	-10.0379	39.3455	21.0586	-6.59997	48.1449	-32.3585	41.0479	53.5362	48.8459	45.8773	-35.7691	71.4683	36.2017	-18.6328	6.46642	-13.0761	-1.28596	46.8872	-21.2622	23.7223	55.5798	24.5906	41.5984	45.1751	42.5942	98.8004	-20.9062	24.2511	9.89549	-27.8693	0.88098	29.0592	4.1059	12.1115	-23.0993	9.00479	16.9436	11.1526
15	60	2	19.7279	-31.239	-24.7504	-26.9547	-34.8863	53.8808	-0.736777	-3.03774	-39.6185	-12.3036	-17.4822	-29.9779	-33.6054	-28.82	-38.8934	-45.7201	-24.8097	-42.7897	-18.2047	-20.7769	-28.7923	-24.0183	-28.113	-0.701103	-43.8966	9.49564	-11.7639	-15.3646	3.09527	-26.5936	-24.0229	-33.1457	-14.3144	-13.5245	-31.0807	-27.3516	-21.9653	-46.1988	-40.3077	-14.9748	-39.7884	-19.6038	-50.6993	-47.3468	18.4809	-24.5756	-4.60512
15	60	8	8.83208	-47.9084	-45.311	-44.596	5.41781	66.8508	-42.036	-14.0035	-50.0765	4.91036	-28.2792	-29.9126	-45.4927	-28.5715	-42.7497	-30.0771	-42.9432	-13.4743	-37.0908	-59.9656	-43.2813	-39.445	-18.1517	31.7673	-40.3126	35.4831	21.5349	-3.70904	-11.9203	22.9822	-34.0448	-19.1429	-12.3506	-17.5129	82.6592	-32.2684	-22.2679	-54.3988	-43.8428	-16.9589	-6.04933	-22.2889	-16.9276	-44.7292	0.276063	-11.4971	-3.72804
15	60	24	15.3044	-31.6305	-12.7077	-22.9044	-26.5191	99.9436	-10.5519	-31.3441	-31.5314	1.70552	-18.6853	-28.4523	1.87619	-30.8877	-29.3295	-39.1108	-26.0423	-46.1752	-32.272	-38.3439	-18.0612	-23.3111	-19.0556	-7.49129	-39.666	20.8052	17.0463	-3.78727	-2.90929	-11.1181	-14.0921	-7.58283	-38.0374	-9.61238	-17.9943	-45.2746	-16.0234	-24.89	-32.2604	-20.5508	-22.784	-37.459	-36.3781	-45.0218	-11.2022	-14.5885	-20.4273
16	80	8	12.9777	-55.3928	-48.4061	-10.1435	-46.3952	78.7069	-46.2431	-34.7886	-45.291	-68.23	-66.7257	-23.5188	-31.1851	2.10436	-56.4152	-36.8313	-39.8683	4.81208	-2.71239	-45.4498	-74.1943	-35.8759	-58.075	38.6611	-43.1884	-22.56	-14.2959	-17.5965	-50.7631	7.43721	-36.9051	-27.9957	-2.18978	-39.8137	-4.23006	-37.7111	-44.518	-52.9605	-40.32	-21.2278	27.7419	26.2547	41.6617	25.4555	-4.58412	-2.6765	26.2272
16	80	24	41.6337	-21.8068	-28.6239	-19.7374	-36.1953	-1.10881	-28.9959	-29.6176	-33.3534	-24.4283	-67.2441	-10.9492	-14.4527	17.7338	-57.6056	-41.9608	-40.9556	-1.84118	-10.1111	-51.3155	-70.2245	-32.2865	-42.1938	64.0583	-58.2381	-43.5895	-100	66.2527	-27.6368	104.298	5.35303	-8.29788	39.4145	-31.8701	-6.59541	-24.9115	-26.8838	-29.7867	-9.15745	23.43	75.4351	24.7144	54.6212	74.0394	25.3847	6.89339	82.9672
17	80	2	-11.6589	-58.8004	-10.8033	-14.5688	-42.7391	-9.9601	-30.5397	-35.8275	-31.0218	-25.9696	-25.7863	-19.1292	-19.8217	-21.6136	-28.325	-24.7518	-38.7378	-35.7024	-6.48124	-26.723	-42.4077	-18.7161	-23.5745	11.998	-30.8225	-26.8242	-7.47689	-21.7005	-13.9397	36.3467	-8.13753	11.6578	35.4196	-1.03332	14.7248	-21.0015	-11.2553	-26.1209	-40.2321	-38.9722	22.5941	40.1692	73.0528	-5.54007	-0.977873	22.0692	96.3435
17	80	8	-8.94341	-36.7178	-12.6711	0.94514	-55.7581	-23.2698	-42.1138	-32.8113	-7.23464	13.1633	36.1559	28.0105	-47.6536	25.9752	-37.4183	20.1602	0.338056	-6.02153	-13.9987	-44.2765	22.1641	29.4204	-17.6398	28.4193	30.1042	-17.4451	35.5731	-3.55336	36.4825	30.4908	17.68	-2.06296	24.8986	33.3761	43.3033	0.810913	36.1837	-17.0783	-27.2111	-34.2763	25.9059	66.2882	65.7881	117.56	22.3466	11.6045	118.758
17	80	24	1.29577	-30.9639	-16.0102	80.3032	-36.2709	-18.6559	-28.9984	-15.0887	6.93345	8.92962	77.4136	74.575	-20.8204	67.2045	-4.78869	12.57	30.362	-2.39884	37.8961	-5.19517	55.961	76.352	-6.09543	40.8568	11.1221	19.9339	121.342	-0.881431	84.2371	22.2937	12.4781	39.3526	24.0042	36.6693	124.801	-8.60458	112.593	-12.7633	-23.1454	-13.2794	16.3646	32.0202	70.8057	65.2498	18.8807	2.1365	154.031
18	80	2	-1.21054	8.83425	12.0668	-34.6215	-27.2442	-11.228	-8.59651	-21.8153	-25.8672	-20.3507	-49.8287	-55.0003	-12.8363	-46.0782	-1.12326	-5.31512	-21.6092	-12.8707	-13.7701	-30.5478	-67.5748	-40.2312	-46.9142	49.0363	25.4779	-78.7891	-9.03385	20.642	-44.2585	74.1862	-35.4216	-41.3677	-37.3902	-41.555	-49.6795	-4.67069	-15.3022	36.1549	14.5954	-27.8063	23.7215	30.186	12.2387	65.3494	9.1239	-2.81045	21.1194
18	80	8	17.0526	-24.8709	2.67479	0.492911	-30.846	26.3346	-42.9797	-6.44964	-29.7816	-15.3289	-48.3497	-13.8588	-46.309	31.167	-51.4074	-11.5251	-40.8105	42.3186	-40.7166	-49.0923	-32.1229	-55.6086	-73.2813	130.6	-55.5391	-39.4431	-2.1453	77.6195	-100	56.4961	-42.3922	-1.00459	-21.5711	-4.59658	5.45237	-33.3213	-17.481	-1.15464	10.6471	117.655	93.9828	62.4693	53.1334	138.417	32.1785	15.5975	18.9972
18	80	24	73.933	-21.317	-12.0559	1.73082	-37.0237	21.2153	-31.4872	-18.4878	-17.8043	2.80289	-55.6195	-41.3075	-29.3012	-3.67681	-47.6674	-32.8471	-21.2435	28.8361	-37.3821	-53.25	-58.332	-49.1287	-70.4133	116.881	-8.19117	-9.5453	25.582	88.7063	-100	75.8615	-15.1275	-7.11184	-23.4	5.19637	43.3963	-23.378	42.1806	15.4042	-26.9292	145.396	135.725	68.0634	78.395	50.1027	19.2281	21.3668	-9.0003
19	100	2	15.7249	-44.6782	-5.47171	-9.20436	-37.351	4.76747	-17.4064	-55.9733	-45.6386	-44.4551	-68.628	-40.4929	-26.6335	44.2046	-51.7855	-23.9658	-61.4086	-13.7905	26.4557	-63.2084	-42.91	-54.5838	-45.8979	95.397	-19.5392	-11.409	-18.6486	-7.45512	-20.9835	91.1336	-6.39068	34.4959	-2.13771	8.18795	-34.2734	-45.3641	-27.9641	-55.2906	-40.2489	20.8553	212.709	42.8538	39.9665	-6.67723	-14.4201	6.1181	8.45191
19	100	8	30.4302	-68.4492	-28.5756	-6.90416	-60.093	-41.8089	-42.9549	10.5606	-48.6062	-44.9016	-73.3339	-16.9718	-52.3735	-39.2106	-55.083	-33.6409	-65.4083	-49.1985	-7.09405	-73.266	-37.9264	-77.5154	-71.912	168.6	-61.2088	-2.30542	-16.3492	12.5304	-100	197.27	-55.0607	-43.2943	-14.0956	-12.0661	-63.9808	-45.4435	-25.9589	-68.9399	-41.5006	-31.1559	114.09	63.0543	62.7555	16.82	49.5549	8.9105	-13.546
19	100	24	57.1417	-72.9622	-22.0931	-6.0217	-44.6512	28.2035	-42.2151	-27.778	-30.7785	-74.5744	-79.7638	-55.1	-57.272	-40.5012	-70.4591	-37.8344	-43.0168	-10.8644	-51.8359	-65.0195	-51.7371	-59.0206	-51.4221	208.8	-7.9773	17.5281	-18.3008	39.9488	-14.1112	220.646	-53.936	-15.8113	5.24127	-1.31727	-40.5101	-67.9039	-19.2628	-71.2556	-53.2637	-16.9272	202.91	93.9123	111.045	28.4889	-3.57657	33.828	-17.4722
20	100	2	28.253	-50.7118	-26.9475	8.8486	-39.5922	10.316	-41.5309	13.5963	4.4832	-6.28947	22.0519	75.4254	-12.2882	12.9033	-14.6233	-3.94022	19.2846	35.4411	31.677	-20.5772	62.9489	23.7705	-21.1037	69.6595	22.3518	3.41028	29.0887	34.9646	28.0868	79.6851	134.268	0.135562	32.816	7.65487	-17.3628	-2.55629	28.3533	-17.1062	-4.08097	30.4946	63.5513	87.4	57.063	60.3836	15.1433	29.6111	158.67
20	100	8	10.2318	-28.7197	-12.8378	19.9183	-10.9541	4.19406	-29.7846	17.3573	-2.58293	8.7285	13.1812	28.1834	-3.98092	9.49496	-28.1495	2.94285	19.783	16.2227	30.4997	-28.5881	40.2456	22.2638	-30.7569	141.767	-6.75984	-5.20407	101.651	107.686	26.8756	109.124	52.6195	21.9808	25.2978	1.12626	-16.3541	1.4598	47.8854	-38.982	-36.124	8.27465	58.327	43.3371	71.0378	114.032	9.52925	11.6138	104.203
20	100	24	36.2818	-44.3192	-25.6105	-3.44481	-28.6038	-4.8336	-39.7387	-13.6761	-24.212	-27.8632	-11.0924	13.1998	-24.525	-8.60588	-40.0934	2.15028	-28.5657	-1.95926	-1.72811	-35.7756	26.3102	-6.85592	-31.2042	41.0349	-19.8254	-31.7394	47.9177	26.1062	6.82649	6.92595	-9.90954	-16.9973	27.282	-7.13023	-45.0709	-14.9167	1.43684	-42.6223	-45.215	3.86914	0	44.8129	636.272			20.889
21	100	2	19.0345	-46.8722	-19.9993	-24.3993	-39.6852	30.6718	-28.1996	-22.0908	-24.8805	-27.4699	-58.3906	-1.00882	-39.5483	-8.24732	-63.0706	-28.3603	-58.1795	-45.6445	-33.2517	-49.7202	-26.1113	-35.1479	-35.9326	40.7498	-25.5037	-8.566	-30.2682	0.652194	105.825	-40.0253	-2.89036	-15.0018	4.26413	-26.1849	29.0956	-16.7752	-34.5712	-39.9126	-34.5524	1.17793	39.5784	48.9756	42.7274			-2.72941
21	100	8	1.40369	-33.038	-10.9232	25.3972	-22.6923	37.5722	-19.3354	-27.7077	-24.2131	-18.7986	-67.3369	-29.8295	-24.8817	-8.39299	-52.0866	-20.8914	-37.7954	-10.8611	-27.2264	-48.9999	-13.1857	-48.4854	-40.7035	28.523	-4.25893	5.91751	-29.9155	4.56668	42.9312	14.9084	-9.16871	-15.0539	33.4478	-2.55602	58.2996	-33.3345	-16.6676	-25.5301	-18.2247	49.9155	44.8559	11.2342	15.7429			-5.98981
21	100	24	23.5999	-36.9748	-20.8685	23.3885	-43.1473	43.1301	-37.1976	-26.2287	-32.7574	-34.0576	-63.593	-35.4829	-45.0102	-17.2037	-72.2685	-11.6203	-39.9891	9.48201	-19.0393	-48.0705	-59.5465	-44.552	-30.5942	15.3101	-40.8062	-36.641	-29.3146	-4.84079	-6.32874	-58.2533	-23.8211	-23.6806	15.0623	-43.0034	-44.9696	-32.6742	-32.6444	-48.7445	-29.8766	15.8637	38.3202	25.1298	2.70623			1.43975
22	100	2	-4.09473	6.1666	0.654986	283.581	-3.02446	-4.12189	-26.3723	-40.9162	-23.2229	-5.14782	-8.04433	22.6519	-22.1022	-56.8762	5.45222	-25.9988	-27.0507	-43.2152	5.23768	-14.8744	50.6291	-32.4543	2.04978	-4.25603	29.6503	-6.60577	-21.8453	-14.3055	18.3414	19.2982	20.6162	63.8575	4.30809	-3.49162	16.2493	-4.05415	36.6704	4.96264	24.3415	11.8399	6.03193	28.9767	7.31823			2.47336
22	100	8	15.2445	-46.7076	-3.9791	23.7849	-33.2734	18.2051	-53.497	-60.7089	-41.5995	-21.3599	-66.1577	16.5176	-57.9332	25.6685	-63.0324	-41.689	-47.3518	-46.8692	-9.34133	-70.1923	4.47732	-58.3427	-64.3377	60.0662	-41.081	-52.7092	1.52336	6.79468	-17.566	35.1676	-45.6875	18.0278	36.1858	-11.2105	-18.8809	-60.5335	-21.3256	-48.4994	-35.7246	5.21323	56.5966	45.4672	49.0503			-3.77241
22	100	24	54.8715	-59.0608	14.3372	12.4549	-4.67303	20.5643	-45.5799	-47.7102	-40.8217	-46.698	-76.7305	61.7767	-17.7105	-34.4412	-63.0837	-54.2013	-61.7899	-32.9901	-5.16938	-48.9825	18.8796	-50.5168	-49.418	103.824	26.348	-48.9564	-34.6904	5.5193	-35.2185	128.321	-20.2225	17.163	6.33415	-4.26926	1.12831	-61.3411	-18.4104	-42.3176	-44.1483	18.223	97.0131	47.2681	64.2345			14.1659
32	245	2	0.178057	19.3852	24.5435	11.9011	3.48424	-2.60042	46.6348	-7.50315	15.5724	119.436	70.6327	60.8211	45.2649	8.47657	68.8681	32.3492	6.57489	27.615	-23.5335	13.6927	-34.2905	12.9456	1.20561	-42.6259	-7.37531	-18.8021	25.4457	-41.0712	-17.2015	-16.9552	-4.55584	5.26645	-5.13611	21.0836	-36.5872	15.9937	-19.3291	46.1788	23.6214	-29.6809	-14.7742	-18.5129	-15.4277			15.4243
32	245	8	3.70194	16.4101	24.2315	19.9387	32.2492	10.1532	73.2545	-1.60414	29.8967	59.5607	68.8835	35.6846	34.088	-20.7906	37.8112	74.8419	8.15233	31.0921	-0.511854	31.0163	-10.1469	46.9341	16.1716	-26.4442	41.4307	-60.3875	16.6895	-7.02866	31.3591	26.0394	5.59089	-44.6318	-16.475	-34.3056	-33.3196	55.6106	0.587304	-27.069	38.9005	-14.8583	-14.4085	-19.0244	-9.12548			18.9504
32	245	24	8.68832	53.1862	34.8728	26.9444	36.7736	18.6751	83.8189	39.058	32.9011	158.352	132.046	63.9966	40.9357	58.5679	59.4345	74.2568	85.7824	72.9035	-24.7143	33.9874	-0.396608	68.4046	25.0869	-42.3461	-2.69859	0.889842	-2.7731	-10.2256	128.713	-6.39949	2.37138	18.7909	-22.3807	4.3072	-17.0485	46.8675	4.20992	57.6299	38.8684	18.7714	-4.32454	-34.4152	-13.3494			14.1197
33	330	2	5.53726	-16.98	-2.89834	56.7323	-15.8985	21.2005	-18.6792	-12.713	-2.58186	23.7026	-16.7317	63.5032	2.30322	-53.1919	-18.5622	9.34206	-11.9125	1.95336	40.2963	-8.81238	108.578	6.25635	-39.7836	-12.7541	-29.1511	36.8794	0.250882	-30.8646	-14.1658	6.56325	45.9607	-26.8542	3.61212	-25.5834	2.33269	-48.7925	19.4785	12.625	-39.1895	105.836	-13.2375	5.68712	-7.13076			15.0308
33	330	8	-11.9681	-21.7468	-22.5477	26.5278	-13.4256	-6.36601	-22.7934	-9.29338	-12.3788	10.5768	-31.3031	27.9459	-0.347475	-18.9304	-45.0814	56.5793	-4.895	-29.0575	-12.1293	-26.1702	-26.1533	-22.3123	-50.0255	-10.8478	-17.5136	28.1794	-9.95682	-16.5692	21.5492	28.1545	-27.1198	-40.207	-46.8631	-9.61241	35.3903	-14.6509	-2.10427	-1.4799	-17.0595	58.2688	3.0764	13.6035	20.1496			14.6647
33	330	24	17.6727	-45.4756	-11.8722	-15.0113	-15.9114	-13.8829	5.45395	-39.0298	-8.358	-29.6783	-54.3529	-3.18277	-23.6552	-32.0846	-13.4805	-54.9466	-60.1194	-28.1234	-41.7369	-37.8459	-37.1818	-25.9844	-36.8824	10.1536	-25.2314	-28.1077	-14.1126	-7.32217	-20.5261	64.1315	6.46225	-47.5528	-31.27	-44.9734	-16.5665	-32.4875	-8.41792	-11.9151	-36.7947	10.7059	11.0183	6.26422	-2.53918			-0.368238
35	330	2	5.37335	21.3589	-14.7693	-33.474	6.64728	-35.8943	-14.1389	-45.1432	-21.5629	-39.9437	-53.7701	-69.1217	14.4367	-53.9353	-43.0016	-34.3783	-70.6023	-49.1139	23.0475	-8.23052	-60.7565	26.2198	-23.8487	35.7744	-28.3764	-68.2686	-21.7619	-22.872	-82.9309	-20.7557	-26.3332	-37.3947	-26.8947	-18.552	-47.2729	-19.6108	-40.1986	22.4906	54.5446	-55.4703	17.0911	7.39965	19.0982			-22.3089
35	330	8	34.4395	-27.111	-42.3235	-32.4211	-26.8098	-42.0847	-45.7616	-46.3663	-39.526	-57.2605	-61.5558	-64.9274	-24.3544	-16.9365	-49.1391	-15.6136	-74.5173	-58.3024	18.5113	-42.3933	-59.7528	-50.0095	-60.5271	52.0413	-38.8887	-63.1514	-32.7236	-15.0703	-65.1747	-11.2938	-55.9778	-33.3287	-22.8841	30.1932	-59.8938	-28.5258	-73.965	-9.59569	-16.9302	-51.1786	71.2058	-3.27969	12.9511			-17.6303
35	330	24	29.3128	-46.1186	-40.2196	42.5472	-25.2254	-31.9278	-43.7096	-47.3569	-43.6942	-61.2601	-78.4939	-66.1692	-49.5484	-36.9061	-72.7514	-44.1241	-85.0064	-52.8794	-43.4781	-66.2997	-68.0007	-67.9678	-58.0299	54.759	43.5264	-61.1543	-55.0399	-27.6457	-71.4168	-40.5491	-52.1584	-45.2646	-40.9236	-30.4969	-77.3787	-52.7938	-53.2301	-78.8831	-28.9452	-63.0277	113.927	29.5206	35.7728			-15.0797
36	450	2	-18.5767	-9.91096	-17.9129	-1.18055	5.6586	-20.1094	18.8246	-13.9727	-3.32021	-4.41835	35.8762	-7.48616	6.33596	30.8633	17.7643	-32.9378	9.58098	102.089	2.09078	2.19475	-42.6864	-14.3006	-3.71636	1.23179	65.306	-10.9913	-42.0414	-21.0398	-9.27998	3.24183	-27.2618	5.87981	-0.554605	5.47826	-31.7454	-17.0072	-17.0736	-10.1732	-19.6857	-30.6885	-12.5655	59.4819	18.6028			14.8314
36	450	8	14.463	-51.748	-29.4502	-29.3446	-27.0461	-13.4048	-24.8426	-12.4707	-31.049	-24.2012	-37.6956	-54.9598	-12.5037	63.6275	-32.295	-24.4801	-41.5826	34.1977	13.9396	-38.0576	-44.1451	-32.2194	-9.57907	103.692	91.7167	52.3868	-9.41852	45.1438	16.8041	105.468	-23.1244	-40.8015	3.37972	18.982	-65.6956	-14.2044	-48.2183	-37.7557	-48.7235	-26.4909	39.8859	128.117	39.5426			33.8983
36	450	24	2.54485	-16.4985	-23.5702	-19.5466	-22.8141	-39.9281	-22.8075	-30.0513	0.901463	0.853715	-26.0351	-16.2654	-27.1756	10.5234	-31.705	-23.7017	-26.2539	44.1907	4.36489	-40.289	-36.746	-27.0575	-11.9148	1.95112	-12.0093	-6.59217	-4.23435	6.5725	19.7021	-3.00613	-45.6203	-20.8651	37.9271	44.2937	-25.0951	-10.615	-18.5181	9.32572	-24.0926	-11.8711	-4.68067	21.1102	-27.9094			-13.0578
37	450	2	10.1652	27.2782	47.6685	-1.60307	30.1084	25.9803	28.5829	-24.6509	30.4812	22.4047	25.5793	-12.431	49.4014	-12.0351	2.51421	-10.715	13.0989	11.9666	194.069	49.7295	-32.7811	8.16425	43.5295	11.8748	45.1913	55.6496	-25.067	37.5101	50.7783	26.6795	9.74604	0.29138	-4.21432	-42.4613	-6.57496	21.1056	-6.19101	24.4179	1.27102	2.30857	-18.3953	41.3449	27.5645			23.5437
37	450	8	-1.69249	-8.31525	-10.2388	-0.791105	20.9453	3.97772	-15.7321	-15.2557	-10.4066	-9.60036	-41.3312	7.56579	8.85097	-19.937	-39.5676	5.52704	-35.5149	-32.8292	173.512	-1.05085	-41.6736	20.0589	-20.4535	20.8894	22.9396	18.6747	-36.2069	-13.0167	6.51155	107.233	24.4057	4.14096	-15.8548	-44.8681	-6.39774	-7.18549	-27.902	-22.2526	-26.4116	78.7238	45.4843	14.9699	23.18			18.2837
37	450	24	5.93037	-7.23462	22.6008	-23.0659	18.2033	29.5264	-5.69655	-7.08984	-15.4559	-4.18348	-37.0207	-2.9747	-6.19406	-56.2658	-31.9809	-5.22424	5.10053	-50.2478	83.5237	-12.1383	-43.8702	-19.9306	-18.3392	-0.464002	19.5885	9.18996	-54.3624	-4.97722	11.513	41.2093	-6.83578	-9.14302	-19.2542	-4.05844	-24.8725	0.270187	7.63756	10.04	-24.0809	3.02796	21.9698	6.58434	9.1724			1.15712
38	450	2	-25.0364	-47.0995	-4.63415	-22.481	-34.1629	-27.1322	-30.1369	-12.3786	-29.7233	17.7549	-50.6828	-37.1552	-4.37761	-25.2842	-14.9656	-42.5266	-64.561	21.7869	18.465	-29.6595	-57.1976	-47.5302	-46.7147	-0.447882	6.21388	-48.7813	5.83045	-12.2762	-70.1869	42.1393	-8.47097	-29.6025	-22.7316	-53.917	-35.9726	-27.9289	-61.534	-37.1939	-30.869	-33.3372	18.3023	1.38527	-15.1863			-14.835
38	450	8	-13.1706	-22.9739	16.8251	-8.52553	-12.286	-32.8519	-6.84959	-9.46561	-14.5211	73.7908	-31.5754	22.4882	-10.683	35.6226	-14.7066	-4.82017	-54.2767	114.092	23.0456	-20.4394	-43.8346	-39.692	-34.2681	-2.19782	-24.6385	-38.1887	51.4928	-16.3438	-29.1747	28.9374	-21.7202	-40.0045	32.5725	-0.2234	-20.8417	-21.8751	-31.77	-21.6753	-19.8525	37.194	19.3969	-7.103	-6.17931			12.029
38	450	24	25.8425	-43.989	0.922123	-5.19323	-26.2455	-20.9945	-56.2183	-28.2227	-23.1217	46.8417	-45.7583	29.2209	-20.5865	-20.7725	-37.9276	-14.9308	-63.5809	130.413	3.40855	-52.3792	-51.0664	-59.1062	-51.743	48.2599	-27.9996	-18.451	18.2618	-43.2478	-40.2442	65.1284	-15.8087	-27.1504	36.1115	3.60338	-0.964143	-10.0564	-50.1473	-15.8722	-33.7547	-12.8688	140.486	8.11166	34.6983			5.71518
39	330	2	-1.12681	-14.5624	9.51781	17.3962	-16.6411	16.241	-4.62141	-6.2363	8.16358	13.0335	-26.998	-25.504	9.02029	32.1965	-5.01335	-2.75989	-11.6652	-32.2793	4.09693	-5.2768	-8.67182	-26.5048	14.5612	7.10895	-0.969541	24.5674	44.0045	-1.6127	-2.87089	-23.6032	9.57175	-36.8833	-31.8566	5.04914	-10.2371	-27.3365	-34.746	-34.4508	-12.2163	-9.49451	-4.20236	65.6995	23.4963			12.8149
39	330	8	43.374	-6.29617	3.26027	-35.0777	-18.9538	-1.23208	-19.2651	-20.3268	0.744986	-53.2781	-36.641	-20.9726	-7.81678	59.4142	-19.2938	-10.2529	-59.5812	-34.7677	-10.3793	-19.939	5.33911	-41.4816	-27.5125	44.2418	-51.3222	-0.969215	29.8477	-4.27419	-16.1923	-6.0738	-32.0599	-27.5495	-4.47403	6.70754	-20.3469	-13.113	-2.50233	-53.1724	-23.717	-5.36738	-8.80012	62.9723	36.9464			12.29
39	330	24	46.018	-27.208	-12.4378	75.5903	-35.2777	13.8832	-32.5544	-5.53747	-32.373	-19.8893	-44.1927	-9.04064	55.2679	-10.5165	-20.5667	-15.0795	-51.4361	-11.6866	74.6925	50.2429	1.78335	42.3051	-10.2541	169.538	-56.6273	-19.5318	28.5574	20.4484	-31.7541	-19.5871	23.1229	-20.5665	227.651	3.99557	25.4032	-18.7747	-9.07563	-31.9024	-15.8042	9.29454	9.48874	-52.5731	45.3403			-1.83752
40	330	2	-1.5536	28.0285	57.9662	12.9139	23.1051	-0.961701	48.0873	23.8189	32.6299	97.0891	41.3622	-34.9859	46.344	139.575	46.7822	48.8468	125.086	-35.9701	41.3962	0.42577	-19.7969	2.31137	18.9686	13.8523	48.9697	46.5829	-15.9886	18.3005	-6.23594	28.3286	140.793	-7.17884	17.633	21.0141	15.0082	-12.9327	-4.48044	43.633	29.0753	1.83587	14.07	53.4503	16.6731			17.3787
40	330	8	-26.3085	-48.6777	-21.4369	-11.2641	-28.6979	-27.7034	-38.4169	-40.7223	-17.4279	-30.1637	-54.4141	-61.234	12.4043	-6.47392	-25.2194	-23.7692	-27.3396	-67.5457	31.4701	-20.2385	-67.6252	-16.3027	-33.4693	27.0004	27.6355	-46.6322	49.1532	-18.1705	-56.8686	12.8423	-10.1751	-39.7523	-35.4354	15.1285	-62.77	-37.9083	-40.0382	-23.3944	-23.9962	-63.1958	13.5971	37.5704	27.0414			24.856
40	330	24	19.8494	-13.6316	-4.29583	-7.46375	9.90405	-0.810266	-34.1323	-28.6743	-27.4827	-2.18908	-48.6235	-58.6877	-20.64	-4.86919	-42.0845	-4.09492	-53.9017	-55.0603	22.75	-49.819	-58.7719	-54.9972	-29.2072	96.6295	32.5616	41.8647	83.2515	14.48	20.509	65.4829	22.0064	-18.4919	-25.518	59.5349	10.1442	-38.8713	-13.5322	12.758	-23.1673	9.30441	103.529	143.507	108.501			19.766
41	330	2	6.29836	-0.401286	28.9242	-1.87354	2.37555	4.15346	-7.91406	-2.60969	2.72858	-4.73402	-18.8204	-54.9492	3.63709	-27.0009	-32.4657	-28.1499	-49.0014	-15.9898	-13.357	-26.7056	-19.3851	-31.1969	-4.15188	31.021	25.6042	28.0684	-11.5242	-11.807	0.626831	11.104	-37.4866	-10.1755	-16.0269	-10.0409	-10.0441	14.9045	-1.14242	0.292186	-11.2445	-9.11213	-6.16966	15.9658	7.74459			0.596068
41	330	8	44.8327	-7.08785	7.58819	45.0571	1.35121	22.8146	-15.7113	20.2267	-18.9235	27.066	-45.0266	-41.7768	3.74709	-0.230001	-45.3192	13.4812	-40.166	4.85002	28.8927	-38.5227	-8.87859	-34.3205	-32.8972	60.1804	-22.0695	119.371	45.0541	28.7972	-0.377912	27.9255	-20.602	-19.8691	20.5089	10.264	-19.255	-3.87667	12.182	9.38546	-32.4398	51.4157	-21.8879	10.8111	12.7901			12.9298
41	330	24	53.9074	-8.86494	29.428	40.3228	-18.4286	-10.6502	-4.27516	-9.40789	-16.5948	21.2656	-11.6716	-33.274	-11.3178	-17.6153	-42.3648	-2.1649	-33.9114	15.6703	4.34715	-11.7815	-1.77194	-17.8777	-39.4435	88.0014	-48.9603	58.8308	0.792029	41.8802	-13.4537	46.8135	-28.1087	2.16851	-7.91582	17.5154	21.9272	-20.5061	20.4205	19.1326	-5.25029	50.272	8.54929	36.2939	41.5241			0.928603
42	330	2	-14.3734	-58.5556	-25.2595	-16.7191	-39.5327	3.81417	-13.8896	-0.39154	-18.8491	-17.1237	-58.4921	-13.1605	-12.9914	-3.68836	4.29842	3.18131	0.779893	20.3451	-4.78623	-20.2605	2.36405	-32.0787	-15.314	16.4665	-22.136	-14.7723	-39.5689	-14.9033	0.514909	0.548472	-32.619	-32.8356	-14.7794	-38.7821	22.2311	-32.1757	-24.0169	-27.695	-60.5371	-52.2274	22.1849	11.2289	-12.2272			-17.9307
42	330	8	-7.4023	-70.3313	-21.1149	-2.18782	-65.2597	13.5665	-24.1153	-47.1043	-14.4431	-46.5719	-70.6608	-23.6613	-41.0986	8.07173	-41.0168	-13.6639	-27.2368	-22.8839	-41.5699	-37.3431	-27.0841	-34.3972	-59.2248	53.9179	-36.2218	-36.9395	-55.5713	44.3599	-23.2437	24.9299	-57.6684	-45.4149	-49.1372	-44.2959	-34.5807	-41.4464	-22.3511	-67.3305	-65.1329	-56.0731	44.9392	20.3481	2.82087			-14.6502
42	330	24	12.1551	-68.7014	-42.04	20.8474	-49.1615	-4.96916	-39.4658	-2.52348	-18.119	-24.2313	-73.7274	-44.6015	22.4038	81.5973	-31.1227	16.6442	-36.3899	-10.5419	5.95489	17.9475	38.7726	3.74179	-13.2794	158.708	-54.2508	21.2001	-28.4368	41.7285	-7.76838	25.5235	-36.1158	-35.7447	157.018	-40.0612	-7.009	-12.4447	-35.3114	-51.4836	-62.5203	14.4121	80.5685	17.6955	28.2798			6.84038
43	400	2	-22.1773	-33.5576	-37.3256	-4.29438	-14.7359	-0.0971499	-34.6191	-9.56706	-33.8531	-13.1822	-46.6038	-32.1574	-6.40099	49.8568	-5.92014	-22.0798	-22.2763	-29.7562	38.1782	-6.82146	22.4293	-1.81511	-8.94225	-37.7905	21.1364	-18.642	-36.0109	5.71489	9.74107	-13.2497	1.41251	-3.48102	-32.8871	-4.87503	-53.7283	-44.2441	20.3093	-33.7863	-29.6635	-37.6574	13.6107	19.9633	44.9173			-1.70469
43	400	8	-7.02357	-59.8826	-39.1498	-29.549	-33.5181	9.97456	-46.722	-25.7674	-50.6302	-23.5287	-77.5438	-41.0929	-39.2332	-29.5792	-35.5577	-7.76025	-68.2242	-10.9706	-7.92719	-44.9275	-5.00754	-58.6213	-43.2656	54.3119	1.19335	0.716018	-29.4961	56.6614	11.6039	61.5575	-31.8017	30.4871	-32.3755	21.1789	-34.566	-42.5279	-4.99244	-72.2077	-40.8423	-51.0928	58.3185	67.7122	64.2673			-0.413207
43	400	24	9.72806	-51.619	-20.0465	-6.28303	-30.5906	-6.31462	-41.7683	-18.0049	-37.3627	-45.7023	-62.8602	-29.5948	-33.0697	13.3216	-38.0401	-23.0875	-45.2588	-15.2402	6.90517	-42.1052	22.6675	-45.4847	-16.1944	19.6874	26.0454	-17.5051	25.8853	57.3968	-3.07802	25.8493	-27.2609	-30.5588	-42.0147	-28.8625	-18.3792	-50.2855	-19.4964	-51.0211	-33.1897	-71.3784	70.8411	38.1795	57.7804			-2.89454
44	330	2	11.7118	-50.3581	18.6137	166.664	-35.2025	-13.0078	-18.7601	19.5097	-8.92083	17.8934	53.3363	78.2686	-22.8248	142.427	-29.8763	63.1929	93.9166	45.9361	108.114	-19.6832	60.3391	101.636	-27.9092	49.961	-24.1471	4.00241	85.6619	0.359553	103.294	55.6579	31.5207	97.4277	62.4044	132.955	62.9522	8.38301	116.833	-28.8521	-40.5239	-3.29878	45.536	49.6233	12.0322			17.9213
44	330		26.213	-75.9923	-33.2304	136.021	-68.1219	-18.9866	-50.4063	-36.8799	-49.9124	-4.62114	41.6419	66.8992	-47.4948	136.091	-59.0386	62.9818	65.5763	49.4135	58.996	-51.8863	30.4645	76.0124	-51.8621	52.3037	-44.1547	93.3282	141.182	16.0888	98.5918	66.48	67.7292	92.5224	66.217	123.725	119.483	-23.5045	124.618	-44.5879	-58.883	-21.9633	44.4664	44.7739	5.19848			3.24999
44	330	8	33.2312	-62.6325	-22.0068	129.255	-28.3966	18.3529	-41.6105	-20.7324	-49.4884	-9.7693	16.4839	59.2178	-29.0144	131.67	-54.4577	53.519	29.098	20.0925	60.3711	-35.8503	48.0306	68.9139	-19.7271	69.2243	-31.3738	35.7066	134.45	3.6137	161.406	49.2928	69.0923	129.982	73.08	120.703	144.367	-7.06249	157.494	-43.0796	-43.3562	17.8438	26.3605	38.3392	6.81758			25.3304
44	330	24	54.503	-68.3416	-20.1722	75.4166	-58.3072	7.30828	-54.0355	-54.6197	-60.235	-22.9944	-5.40652	-6.08517	-59.2199	56.4765	-68.4554	-9.67905	-4.89002	-11.559	-3.88282	-41.6899	13.9142	22.0015	-45.6634	72.8744	-42.5087	-13.0027	68.4671	-3.31473	63.8197	25.5676	62.2713	104.979	84.2385	81.1022	65.0708	-39.8804	64.6041	-69.9044	-63.6454	22.9561	25.3761	19.5232	-1.99476			-0.684537
45	330	2	11.1971	2.21623	-8.95187	-26.8805	21.436	37.2294	0.649026	-10.2176	-5.40436	-39.4512	-39.6929	-28.5125	-16.0895	-30.9035	10.5158	-24.1591	-42.0262	-13.2546	-29.3695	-19.8413	-35.0916	-37.4621	-10.4173	22.9788	19.8884	-39.9797	-10.2604	-28.8492	-33.5529	-15.9316	-34.5482	-9.06899	-16.3913	-24.3498	-40.6648	-40.1476	-43.32	-6.43905	1.93919	34.3102		17.8899				-2.04795
45	330	8	17.005	46.2155	33.6543	4.66663	62.4159	10.1744	37.7903	43.4712	31.2517	-11.4927	-24.0319	1.54564	5.86948	-13.0646	31.96	-17.4885	-10.8112	4.69182	-26.5454	9.26885	-15.5509	-23.2682	47.0006	32.6807	-2.54975	-33.2872	-31.4859	-0.258018	-11.5003	-10.539	1.45332	-6.95216	-21.4641	-13.3377	-23.6977	7.55863	-34.1154	21.4852	26.5757	18.833		51.4642				25.6469
45	330	24	-9.31667	13.5471	1.89782	-38.8297	7.1783	36.1499	2.53209	40.745	2.04556	-46.743	-43.2426	-25.653	-1.59449	-32.175	7.10918	-32.6405	-46.3258	-16.7996	-39.1014	-31.8082	-37.1963	-45.0324	-13.7276	16.1526	-5.82224	-33.2055	-25.9906	-11.1852	-41.6239	-28.1327	-36.1789	-7.71433	-10.1303	-41.8614	-57.7555	-26.986	-48.4989	-22.7405	6.74444	35.1925		-3.63263				-9.96448
46	330	2	8.6073	-41.3288	-31.5699	13.3826	-50.7325	15.3501	-35.8535	-37.0838	-36.0958	16.1337	43.6764	26.6024	14.0329	19.9623	-13.7909	50.5344	16.4498	24.2685	-15.2397	20.9499	4.66411	32.6966	-22.895	-2.70204	-15.5131	76.0442	101.095	-3.41971	70.2791	-30.0162	-10.5515	58.7979	29.5706	42.1017	81.9817	-25.1226	65.251	-25.7065	-34.1524	21.6702	3.13278	29.3399	24.7274	-2.92174	60.8015	15.4017	217.587
46	330	8	-6.58082	-47.0933	-36.8636	24.2166	-33.2736	23.7866	-46.3463	-29.474	-35.5713	-4.39225	22.0607	46.4397	-6.37139	22.8305	-33.9057	37.2879	31.2126	-22.7249	-17.366	-0.0699014	16.9978	20.0473	-19.3267	-10.3099	-16.2748	130.103	37.5551	50.9331	37.6737	-15.9639	1.42344	21.2601	33.3189	14.7936	-11.9252	-14.0681	82.2224	-34.9971	-41.5409	42.6208	22.095	2.0299	38.3193	-41.9825	34.9144	11.955	37.3395
46	330	24	15.771	-65.1702	-51.1209	-18.5026	-60.1817	29.6184	-58.4174	-54.4712	-58.5187	-11.8406	-9.10314	-12.7797	-32.8504	-0.819569	-59.8729	21.9064	0.91031	-33.09	1.67056	-56.9258	-20.8097	-6.6848	-38.2813	18.3721	-7.86153	-4.91453	19.3562	-7.31532	35.2959	-38.7212	-26.5041	25.0353	-14.8236	7.14192	-9.86346	-36.0716	44.8425	-47.8856	-44.3155	-15.3117	81.814	38.5883	84.242	-20.0139	16.3076	12.5851	120.971
47	330	2	10.8954	-70.3883	-42.6422	-45.8751	-54.4596	14.8708	-60.9555	-44.4361	-49.0151	-49.8627	-76.9863	-40.4919	-40.5369	-57.5308	-68.6096	-11.619	-79.5091	-38.753	-25.106	-53.2682	-65.2581	-70.4101	-51.5373	26.6964	-23.0035	9.37193	-11.934	2.50981	19.2647	125.643	-30.0414	41.082	-13.4543	10.1074	-25.1329	-43.7888	-23.5253	-72.1092	-72.2687	1.61246	0.959472	-10.3193	-2.04398	13.1061	-0.727974	-5.85922	8.74469
47	330	8	5.07553	-64.8425	-31.8737	-24.4277	-52.1483	-4.87191	-50.0218	-35.9659	-57.3431	-32.8544	-78.4656	-50.1994	-35.156	-36.2122	-57.1809	-30.4078	-77.6301	15.4609	-29.9989	-43.4563	-39.3153	-58.9891	-53.7323	50.4266	-43.1226	64.0145	-16.6066	10.9945	48.905	147.17	-51.9085	24.4508	-11.5959	101.537	35.5483	-36.4914	-42.2789	-77.8241	-64.1163	16.6201	32.3832	2.6401	20.3315	5.58021	4.47883	11.2358	-4.40266
47	330	24	17.5075	0.889058	10.2233	-6.08251	13.751	-7.24763	-3.55496	-5.68874	-35.0629	-23.65	-37.9674	-35.6364	-2.43791	11.8195	-37.2243	4.04859	-52.3202	-27.609	8.06627	-26.5735	-31.9558	-45.9204	-23.5925	54.3434	-26.2541	72.9105	32.6995	28.3048	34.8858	138.774	-29.2713	56.5052	-1.98025	39.3084	86.7252	6.10988	7.20391	-44.7127	-14.492	67.5154	20.9038	-1.54102	20.1277	-19.9813	-3.84919	-2.6506	-17.6213
48	330	2	55.0792	18.6666	26.7547	3.96419	-9.34091	8.01396	30.7398	-3.19907	-7.19731	16.6797	14.7075	13.4957	-8.8799	-20.5712	9.12712	-20.0293	10.7198	35.4644	107.799	19.449	54.6166	1.74065	45.3703	60.2668	132.071	39.5577	9.8226	19.7961	52.5161	3.00898	53.9134	11.3112	47.8812	21.8035	26.115	6.57245	-7.66981	26.5262	-7.96971	30.2469	11.2312	82.4098	36.9529	-4.77668	16.7231	32.945	4.86104
48	330	8	42.5491	10.5122	18.1704	17.5384	-12.189	1.2196	-5.76203	-18.5245	-27.1145	-1.67924	-32.7071	-9.71699	1.32972	49.9621	-26.8774	-10.3967	-29.1705	30.3421	68.6135	-13.1197	-11.8024	12.5345	20.8105	104.993	92.6625	21.9868	-8.95611	19.2589	68.1769	39.8332	46.4473	6.70692	27.8598	-10.9679	51.8636	10.4408	-34.7416	15.2053	-23.7462	66.8418	34.4496	92.0236	87.3748	102.485	34.5626	33.1966	28.681
48	330	24	40.4752	-0.382289	8.61104	-26.8384	-18.8156	-28.5458	-7.28379	-25.5474	-37.9911	-39.805	-46.1615	-5.61326	-23.3326	-26.0337	-40.0732	-17.7711	-44.8493	-2.19764	55.2809	-35.2637	-33.6958	-26.9811	24.4769	52.0324	41.064	12.1378	22.2394	7.38535	52.135	-0.621427	14.305	-6.20526	1.31156	10.3821	31.6165	6.33936	-3.7398	-15.516	6.09572	-6.32573	24.3968	24.2014	34.3256	-9.0907	0.311388	5.93487	1.62672
49	330	2	-24.0816	-19.2826	-8.49542	-30.6183	-20.1015	18.6117	6.82712	17.7717	-7.28026	0.292138	-49.1584	-23.5899	0.926392	-52.249	-26.847	-38.7154	-55.0534	-45.0476	-49.236	-18.0643	-47.4332	-45.3586	8.65508	-5.63351	147.756	3.98805	-7.28088	-2.19841	-49.2182	-20.7999	-19.0858	-25.4212	1.32416	-36.9296	-57.2956	-36.9202	-46.2271	-30.5888	-17.2427	11.0342	-29.199	12.0164	-29.2337	-19.2725	9.73548	-17.8839	89.1707
49	330	8	-7.57197	-47.3866	-32.2423	11.5026	-48.6696	21.5615	-8.61736	-9.86347	-4.76571	-3.68074	1.70542	33.6961	-35.1883	-14.4568	-15.7676	-18.2544	-12.2281	-19.2071	-19.2235	-51.8746	-5.32337	4.49274	-56.0057	77.7986	27.2306	12.7379	49.0328	13.1421	-9.91758	62.3385	-10.8426	10.8417	11.9534	2.81745	-22.076	-48.2132	-12.0866	-32.5038	-52.1543	37.9637	22.5117	23.5709	-4.4381	5.57934	26.8512	-10.0596	33.108
49	330	24	7.51677	17.4185	15.7073	32.8753	0.651259	-4.5729	38.979	59.5253	17.168	12.3758	12.7357	25.9103	-2.24749	-4.47199	33.2747	5.58124	0.274315	19.3511	-5.7236	-2.7847	-10.7203	17.2299	1.97972	4.75322	10.3437	101.686	7.16042	13.1911	-6.27878	21.3451	25.5494	-7.80054	-15.4379	3.85021	13.6415	-22.3432	-3.67022	6.13955	-3.20062	68.3647	-24.5144	-25.5182	-32.698	-42.6901	-11.0912	-17.509	38.07
50	330	2	40.2227	3.08969	23.3014	-25.0671	-3.63403	-36.4426	-17.3979	-13.1261	-18.9652	-13.9342	-21.4353	-32.8208	-15.5239	-18.5176	-44.4049	-9.40703	-35.0011	-5.04735	13.7671	-36.8641	-23.5434	-21.6789	-30.077	5.78693	6.99742	88.0859	-42.6837	-20.0419	22.0433	-9.56853	-24.9719	-24.9156	-16.1107	-5.76686	-56.2701	-12.7378	-32.8606	-32.6699	-19.1648	-24.9722	-7.13398	1.81266	-8.6617	10.6244	-14.5987	6.04103	20.0488
50	330	8	27.1156	-45.3613	-8.56027	-46.0311	-46.4547	-46.5168	-39.0893	-38.7359	-49.8669	-38.6364	-63.0129	-41.9708	-33.1255	-11.3023	-48.3393	-41.194	-67.489	-33.1614	-14.2804	-44.1982	-52.3219	-41.1084	-38.3123	17.7398	12.4112	-7.5838	-2.09371	-25.3433	-35.3398	29.3748	-40.7123	-57.1047	17.7065	-19.2188	-69.2529	-33.1909	-64.1301	-33.3719	-45.207	-72.3977	38.5357	14.9623	20.725	-8.08468	-18.3975	5.61017	13.1874
50	330	24	67.5131	-15.8181	15.5027	-17.8098	-31.6741	-41.6993	-12.0131	-13.6574	-27.8398	-33.0803	-41.0821	-18.6053	-29.5886	-54.1462	-41.6814	-44.4557	-23.9453	-34.9756	6.65832	-53.0547	0.179427	-35.8504	-3.40975	46.823	-19.5484	113.247	-11.4898	-3.45664	50.611	41.4351	-13.9895	-24.5111	36.1579	-16.0152	-26.01	-18.7293	3.60012	-9.32317	-20.8696	-51.2703	33.7578	27.0398	22.7249	-5.33009	-29.3213	6.68584	-6.03825
51	330	2	-5.9126	-33.3826	-32.9202	-36.9571	-35.4893	-40.4691	-31.7855	-6.74538	-25.6118	-44.9264	-49.6259	-20.3016	-12.0052	-4.44116	-27.4313	-22.832	-27.0556	-54.5995	-53.8113	-16.9345	-16.8366	64.7038	-28.507	14.834	6.18022	-52.7576	-47.8625	-29.2946	-56.4851	-30.9575	-7.97845	-46.4757	-36.0966	110.72	-62.7738	-27.7211	-41.8655	-38.2331	-18.8672	-24.3656	-12.0123	-15.575	1.73308	-2.75627	26.9825	-9.74099	2.42588
51	330	8	-14.7525	-48.1003	-58.1449	-25.5501	-38.1893	-28.03	-38.0206	-4.79602	-29.3818	-37.6811	-71.7903	-63.9598	-4.15891	43.7739	-34.4932	-27.7266	-17.1645	-23.2536	-25.4339	-25.4235	10.4318	-10.3233	-44.4821	67.7509	44.6538	-100	-14.7357	-1.97858	-43.3194	11.4063	-31.7839	-26.8613	17.2651	112.309	-45.2321	-24.4302	-39.6519	-53.2929	-37.2362	-34.7301	18.4436	-6.31337	11.792	14.6572	39.3494	4.4129	-7.47314
51	330	24	5.62022	-31.7062	-33.5303	-17.9725	-42.9894	-63.0233	-21.9422	14.1246	-14.2091	-44.2872	-42.447	-21.6125	-17.507	-61.8953	-30.8965	-33.7944	4.05186	-11.6588	-15.6323	12.015	-41.6346	20.8027	3.83934	34.0149	14.2879	12.1448	21.9531	-2.82585	-20.9086	-18.9858	45.4643	-15.1212	2.64925	93.407	-45.3403	3.75724	-18.4325	-17.4276	-14.7246	-20.4129	-13.525	-26.2154	-21.5908	5.00465	26.2266	-6.33028	14.5409
52	330	2	22.3909	-65.9394	-38.124	40.1538	-37.6772	23.3679	-61.5954	-16.1981	-51.1195	-26.229	-67.7334	-11.6555	-13.9277	-25.0921	-53.6865	38.8557	-16.8049	-1.7563	-14.0869	-43.0243	-37.4103	-23.8149	-57.2822	-0.298803	-44.4669	9.89588	23.7033	-35.6231	9.24228	26.0384	83.1779	6.5863	-22.926	59.2888	73.8611	-46.1379	-6.84159	-24.2849	-44.7421	-2.38465	108.901	121.442	72.0142	11.2121	28.7243	30.4896	19.6663
52	330	8	20.5181	-71.5776	-24.7039	62.6574	-49.3291	3.79429	-51.1253	-35.9123	-46.8957	-33.6501	-53.6869	-18.7353	-28.127	-31.4098	-39.0223	-3.51619	-15.9836	8.0905	-19.6887	-41.4977	-49.842	-19.8618	-51.5299	4.9873	-0.668718	-9.89703	-33.254	-0.412655	-19.3081	30.1524	28.9376	14.42	59.4006	30.9426	122.496	-30.9749	-14.2832	-37.8004	-39.9019	-2.61844	129.888	191.775	104.871	16.3912	52.1701	48.2505	23.2371
52	330	24	30.5885	-58.7716	-38.536	72.8219	-22.1705	9.421	-66.21	-33.1164	-55.6811	-36.4368	-66.4133	-35.1357	-44.698	-15.4859	-55.7373	-38.9718	-13.3653	15.9248	-15.661	-54.6092	-26.6451	-28.3658	-66.1772	19.4777	-43.1667	110.788	-10.0833	-2.29123	17.6812	26.1048	25.3982	-4.97953	38.5898	10.4089	50.8856	-42.5407	-9.16647	-55.3484	-32.7019	2.89133	84.5673	72.1423	44.1457	11.463	33.5403	7.59156	4.13964
53	330	2	1.92668	-25.8488	-21.5954	3.42162	-15.4844	19.3107	-27.7053	-27.9143	-18.3484	-14.7311	-49.0046	130.575	-7.85994	20.7575	-9.82498	-21.4047	-26.9838	-31.0063	10.777	6.17618	6.94867	-33.5851	-27.0018	21.2121	53.3202	60.6637	5.06588	-34.8934	-0.16261	7.35467	4.05685	19.0338	-9.68314	49.4892	123.858	-42.7058	-25.3505	-29.2674	-26.3279	-17.2412	6.02464	29.5266	20.2126	-24.0724	10.2894	4.64019	14.6265
53	330	8	29.1785	-43.0191	-8.91438	37.217	-30.4187	15.5572	-31.8122	-35.289	-22.6018	-33.5207	-60.1617	126.186	-7.97361	8.40653	-43.9929	-18.7853	-59.8854	71.2395	15.7234	-9.99831	-16.4997	-24.4978	-33.3498	54.5451	4.22717	159.97	39.128	10.5869	35.3931	59.5446	9.27669	8.40806	6.99209	61.8361	131.144	-31.6971	-17.3937	-56.3449	-32.489	36.2007	45.4456	78.477	56.5431	-5.9483	9.50025	23.1637	-19.6399
53	330	24	23.0904	-0.0331802	-15.3151	7.95262	-6.1753	12.5977	-19.5831	-16.8644	-36.0459	-28.9175	-50.4579	63.6335	-5.22845	-34.7106	-15.5124	-32.8348	-27.3033	2.76304	16.3387	-1.4897	-100	-9.80138	-20.887	73.1023	-23.7825	37.9928	29.7142	12.7547	6.13577	83.8433	-18.8431	15.2261	-7.88478	20.1752	119.053	-12.1726	-11.2012	-2.40032	26.4242	79.9296	38.3762	63.4152	37.4547	16.0436	13.9394	21.0808	10.3019
54	340	2	-10.8992	-45.4986	-23.6175	-29.1603	-35.7313	-0.0275608	-34.1323	-26.6136	-40.2452	-49.045	-43.9354	-54.4487	-29.4983	-13.6688	-44.6267	-22.5717	-48.8562	-45.7562	-8.28067	-24.2212	-26.2459	-51.815	-25.076	-40.5506	-2.21627	-1.94402	-24.6162	-18.0121	16.9302	1.63531	1.36921	47.6096	-22.2956	108.618	8.58999	-48.4138	-61.5843	-34.7565	-49.5752	39.8579	6.39633	10.1164	10.5868	-30.7181	9.35574	0.938198	-9.31197
54	340	8	15.7325	-57.7628	-39.9133	-30.4016	-46.3278	-2.69803	-54.5052	-38.1406	-59.8046	-40.078	-64.4341	-22.6675	-29.665	-7.67647	-50.5847	-39.3161	-65.4846	-48.3037	4.22111	-41.6629	-37.4306	-50.1909	-52.5409	-19.2028	-40.203	-7.38961	-42.0351	-11.8208	18.8039	31.141	-10.6191	39.5219	4.13931	76.4147	-33.6303	-40.6679	-42.6788	-41.1624	-57.8161	15.2654	2.13677	11.7724	13.6953	34.3954	22.6916	12.5248	14.7281
54	340	24	7.07344	-11.3061	-1.57716	0.508786	-16.8575	-6.16138	-12.562	-20.8353	-24.2741	-20.8254	-33.8499	-33.9676	-17.0332	-8.25744	-24.5029	-6.99667	-45.5173	-22.3916	-1.57601	-9.73059	-29.5306	-17.6979	2.08058	-8.69066	-8.8308	-38.5696	-32.6966	-5.58308	26.7926	6.73992	4.12784	11.2282	-1.2187	64.7029	21.1306	1.26046	2.63816	4.2331	-11.1367	41.8891	-6.38836	-18.7314	-1.01469	2.60709	3.78218	0.723089	-3.73631
55	340	2	-27.2463	32.2436	25.9132	-10.6477	78.1096	-10.0023	57.8479	2.9935	62.7227	32.3014	49.655	0.619478	21.667	114.596	18.9312	36.5204	137.027	-9.815	12.7256	40.7936	63.6182	109.67	14.1167	-49.0733	49.9182	-11.932	46.0781	-15.0002	-32.5454	1.43301	6.61124	-13.3832	-22.8325	3.44509	-40.1197	17.1803	-5.08128	-1.59593	76.4872	16.39	5.90931	-2.24982	1.25901	-3.5232	-16.0017	9.61557	-14.0924
55	340	8	-5.20187	-13.3405	13.494	-0.562367	7.80356	-8.29116	21.9057	9.28776	12.4748	-0.390869	4.11404	12.2408	6.97588	67.7972	-20.214	32.5487	46.0945	-37.4803	4.32233	13.3254	-4.28141	66.9706	2.73639	-35.2117	15.8706	5.21797	11.3628	-16.9809	-29.033	4.6236	64.4458	-14.1353	-29.9984	-7.10117	-21.2933	11.5638	-29.9416	-11.7056	-4.91704	23.6859	-9.66278	-27.8811	-2.03091	-12.8951	-33.9263	17.4034	2.96923
55	340	24	11.1665	-1.62975	15.0028	21.3426	28.4818	37.3914	-0.309997	-7.5704	0.580913	-18.4613	-10.5918	20.2684	5.69888	78.1844	-38.6019	-4.26527	-8.5609	-20.7279	21.4089	-18.7357	-48.6591	19.5434	-13.0027	77.5662	38.2371	28.3461	30.3737	62.4914	125.922	48.7705	38.8272	-4.67896	-3.1799	33.1639	-4.47345	-8.71478	-5.33625	-14.4742	10.3345	33.5304	4.05023	23.491	30.3536	20.2817	-46.8134	10.5508	90.3762
56	340	2	13.51	-27.6664	2.00401	-20.6499	-59.8373	-5.79892	-22.4975	-28.9233	-28.3569	-25.3074	-16.7025	-24.0269	-15.8477	-8.22337	-22.5478	-3.75449	-26.763	7.13487	10.2885	-31.4155	-11.2209	-25.2836	-58.5127	29.7694	-9.71565	-3.93176	-26.7452	-23.0451	-21.6649	3.43237	-21.4316	14.1357	-4.23211	-9.5664	-52.6792	-40.4419	-17.1606	-35.8232	-43.0049	-9.26062	75.2917	96.0009	46.4428	27.7431	90.0879	36.2693	-8.40352
56	340	8	40.7921	-48.9374	-26.4165	-25.373	-42.7501	-14.5157	-35.6292	-20.5482	-46.5321	-32.8908	-16.7224	-0.197164	-22.3014	-2.02574	-40.2754	-14.9184	-20.6896	30.716	18.6925	-65.9621	-10.4503	-19.643	-67.026	34.8273	-2.10095	42.7605	-28.2576	-2.69356	-15.5251	-7.92652	-6.28779	6.16512	12.7797	-12.0412	-0.742062	-36.6978	-15.7006	-46.6753	-41.867	-12.9908	61.458	55.1459	39.1995	19.1783	41.3552	30.3399	22.9865
56	340	24	44.2241	-63.3884	-43.2906	-18.2629	-63.6723	-12.1205	-56.5243	-16.6046	-40.3564	-18.7937	-5.82806	3.01287	-45.7184	-11.1628	-32.4027	-24.2597	-31.1488	16.2377	-15.6425	-77.9309	-13.4439	-8.44866	-50.0873	67.9993	-8.9289	115.73	-6.24378	-2.75077	-21.4177	-26.7731	-39.1238	-26.5653	-11.1207	-23.9325	-58.005	-34.652	19.4909	-44.2746	-45.2431	-10.6676	107.88	118.11	116.858	21.2578	56.8526	26.9626	-8.03494
57	340	2	-4.17789	-46.4301	-9.8632	-35.8132	-45.0449	2.53116	-33.7597	-29.8301	-10.5973	2.81946	-65.2551	28.5929	-19.6735	19.4759	-50.1034	46.841	-22.1152	36.7182	11.8487	-39.8874	-24.2545	-27.3917	-55.4633	22.7249	-0.406621	-26.3939	-2.54143	2.86542	38.8497	34.8272	-9.62576	-24.0688	-10.7728	14.6142	-12.5	-56.9718	-36.1051	-50.7799	-32.0999	1.5122	14.7601	25.0704	17.2564	18.0408	4.05282	-6.07207	10.835
57	340	8	-9.04574	-29.5939	-18.3182	-19.6253	-20.6737	31.7605	-34.4793	-13.5411	7.75471	10.7286	-29.0074	-15.2612	-16.027	142.965	-26.9335	17.2858	60.9329	-0.0684366	-7.46643	-9.06873	-25.0131	-51.2936	-45.0772	21.9922	8.22739	14.0024	52.4398	23.5778	41.2357	82.2177	-7.77629	6.52556	22.8952	64.432	73.1375	-46.7708	-8.63899	-28.8121	-8.40505	56.3265	13.9309	13.569	12.2072	42.6728	2.76303	-10.1123	-7.06791
57	340	24	2.75783	-55.7591	-35.1864	-61.631	-22.04	-2.03471	-49.3943	-5.83103	-29.5929	6.60698	-67.1981	-37.2829	-6.07589	-28.2155	-48.8592	17.854	-26.9781	36.3008	53.1237	-21.8642	-18.9715	-43.8301	-22.3167	71.2508	47.7223	5.22174	25.9249	86.4929	-16.4816	117.873	20.8951	16.7397	-6.2131	61.4201	-3.88129	-42.5423	-40.8518	-52.9794	-43.0262	31.1243	89.4391	23.694	116.471	22.7672	-26.2404	-1.7392	1.79448
58	340	2	-4.59341	-11.1304	10.652	-4.00837	-25.3124	9.12155	-7.13801	-51.1989	-26.8463	-54.7545	-24.2139	-67.5269	-19.7376	33.7729	-14.2175	-62.3596	-45.1617	-16.2747	1.48886	-28.3531	-51.584	4.69744	-14.8679	-3.16765	48.912	-38.985	-43.4612	-15.5245	-43.7995	36.7975	5.27214	-33.6804	1.41949	3.42599	-48.6292	-10.5963	-18.4021	-47.8951	-33.6369	-12.7283	-6.76009	63.3156	42.4881	42.2537	11.0898	1.30852	46.1349
58	340	8	4.2437	7.41745	25.8355	17.5951	3.89193	59.7522	-2.71242	-37.0606	-33.8246	-58.305	-42.4828	-56.6426	-18.204	-10.6905	-31.0884	-18.2888	-58.2664	-15.2	6.18459	-31.177	-15.5789	19.1478	-36.563	22.4884	2.76483	37.5014	-55.5095	12.1864	-30.77	51.2368	-26.1703	-23.4842	-22.2333	-2.68958	-53.1662	-18.7777	3.83424	-43.5212	-26.6914	119.346	12.434	45.2296	62.2782	33.2811	40.4189	13.9208	32.7941
58	340	24	23.0921	-16.8931	7.16584	82.2415	-35.9724	21.1572	-30.7677	-41.679	-47.9637	-37.9517	-57.0574	-60.6525	-33.2372	-8.42538	-54.3052	-50.2583	-53.0345	-15.4823	-29.0516	-52.154	-8.38381	-41.2218	-40.0096	27.5988	-24.9623	-33.0279	-28.3081	9.02818	-3.58713	42.2916	4.68558	-1.80051	-7.15496	3.98892	-12.5644	-36.1509	91.8616	-34.4453	-13.8073	165.468	43.9337	66.7696	125.568	14.7869	3.2206	13.7615	-2.80898
59	340	2	18.1919	-67.7247	-24.2781	1.97213	-43.651	-8.65232	-31.12	-34.7357	-18.733	22.6798	-60.7246	-70.4458	-12.0259	38.2451	-50.9202	44.0095	-20.148	-28.5814	6.59936	-17.4572	-1.00485	15.4208	-55.3945	3.91895	-9.00628	#DIV/0!	62.2853	-19.6081	-18.3008	10.4324	4.92044	-40.6924	2.3664	-21.8661	-14.7881	-44.3645	-18.2094	1.00903	-36.0955	-10.7851	36.6752	22.4164	9.76038	13.93	17.8361	15.0609	-14.9579
59	340	8	21.9583	-57.1082	-1.84224	-23.4037	-57.7211	18.962	-13.7776	-44.1967	-32.9367	-46.4597	-65.4256	-50.5729	-7.66342	-5.59111	-42.9282	-17.6228	-55.8934	-30.8756	-26.5259	-26.0315	-11.4749	-23.311	-57.2189	1.55573	156.846	#DIV/0!	3.11281	3.29911	-21.4067	23.4026	-9.80048	-42.7366	1.52743	-12.9989	-35.024	-39.0201	-45.1276	-44.3939	-40.8832	12.5831	19.8477	27.5621	26.6418	18.8194	2.95926	23.9345	16.3513
59	340	24	12.4038	-34.3469	-1.38086	-31.7137	-36.7976	-4.44287	0.937527	-22.7492	-16.9505	-2.47528	-47.924	-24.949	3.30929	10.06	-29.1163	-11.0856	-42.8297	5.16612	-10.4115	-6.61209	-14.3549	-6.78135	-36.8253	18.9732	50.8682	#DIV/0!	88.3721	-11.8899	-13.8567	23.4812	3.99643	-36.3225	-8.41667	-16.0181	-52.0513	-38.1026	13.6714	-41.4346	-25.2041	-11.5833	9.37882	26.444	9.01515	4.91014	2.2383	22.6426	11.8295
60	340	2	-10.5866	11.7174	6.1837	109.726	13.3332	17.3487	-3.71715	13.1901	-3.88101	25.088	12.4065	-9.25644	3.21607	105.559	11.9515	-19.696	67.3829	16.4636	9.75882	-9.193	58.9198	47.8736	6.54511	-9.25404	-3.30491	80.8345	68.1824	-29.7334	62.9181	-0.110064	33.3358	20.7479	8.79918	8.40081	49.2297	0.562964	35.4395	41.6773	33.9561	-32.0804	10.5592	28.3451	22.0663	-13.0365	34.0343	2.51752	-12.1418
60	340	8	16.6943	-23.594	-21.5129	29.534	-37.748	2.10203	-23.2233	35.7264	-2.47665	-4.52769	14.0291	-12.1231	-35.4373	89.2597	-33.5548	15.8291	16.5299	30.591	11.7503	-21.476	2.52978	10.2034	-26.4002	32.3409	25.0542	-8.39708	91.9395	-6.49447	37.8531	45.8244	6.10821	45.3311	24.9807	25.1617	98.2771	-8.07696	50.6781	42.6283	96.7061	-0.684097	55.7002	43.506	70.2027	-10.1134	13.3719	18.0634	-18.5549
60	340	24	-0.708483	101.148	24.2801	59.2068	96.8314	33.2587	-2.143	73.8317	23.1742	23.8736	46.5314	38.059	16.7285	165.093	22.6875	-26.6533	44.4079	21.2159	23.5843	4.44168	41.7359	89.4953	7.40595	1.20567	32.3135	-41.9848	16.9682	7.73609	32.5638	29.8162	41.759	53.1349	-3.64929	30.592	40.964	60.3825	15.2775	80.186	134.609	3.40451	42.9087	4.64748	11.4363	-8.13012	5.39553	-15.8207	-21.4994
[truncated: 128 more columns]
